# Supplementary material for: Perturbations in podocyte transcriptome and biological pathways induced by FSGS associated circulating factors
Source: PubMed Central journal article supplement — Ann Transl Med. 2023 May 4;11(9):315. doi: 10.21037/atm-22-3670 (PMC10316099; doi:10.21037/atm-22-3670), 2023-05-04
Supplement: atm-11-09-315-supplementary.pdf [file atm-11-09-315-supplementary.pdf]

**Supplementary****Table S1** Demographic information for patients with biopsy-confirmed recurrence of focal segmental glomerulosclerosis (FSGS) after transplant included in the study

| Demographic                                          | Patient 1   | Patient 2         | Patient 3         |
|------------------------------------------------------|-------------|-------------------|-------------------|
| Age (years)                                          | 31          | 21                | 51                |
| Gender                                               | M           | F                 | M                 |
| Ethnicity                                            | Caucasian   | Caucasian         | Asian             |
| Living/deceased donor                                | Deceased    | Living            | Living            |
| No. of days before recurrence of FSGS post Tx        | Immediately | 7                 | 195               |
| Maintenance Immunosuppression                        |             | Simulect, MMF/MPA | Simulect, TAC/MMF |
| Maximum protein/creatinine at the time of recurrence |             | 11,078            | 375               |
| Lowest Serum Albumin at the time of recurrence       |             | 5.44              | 0.91              |

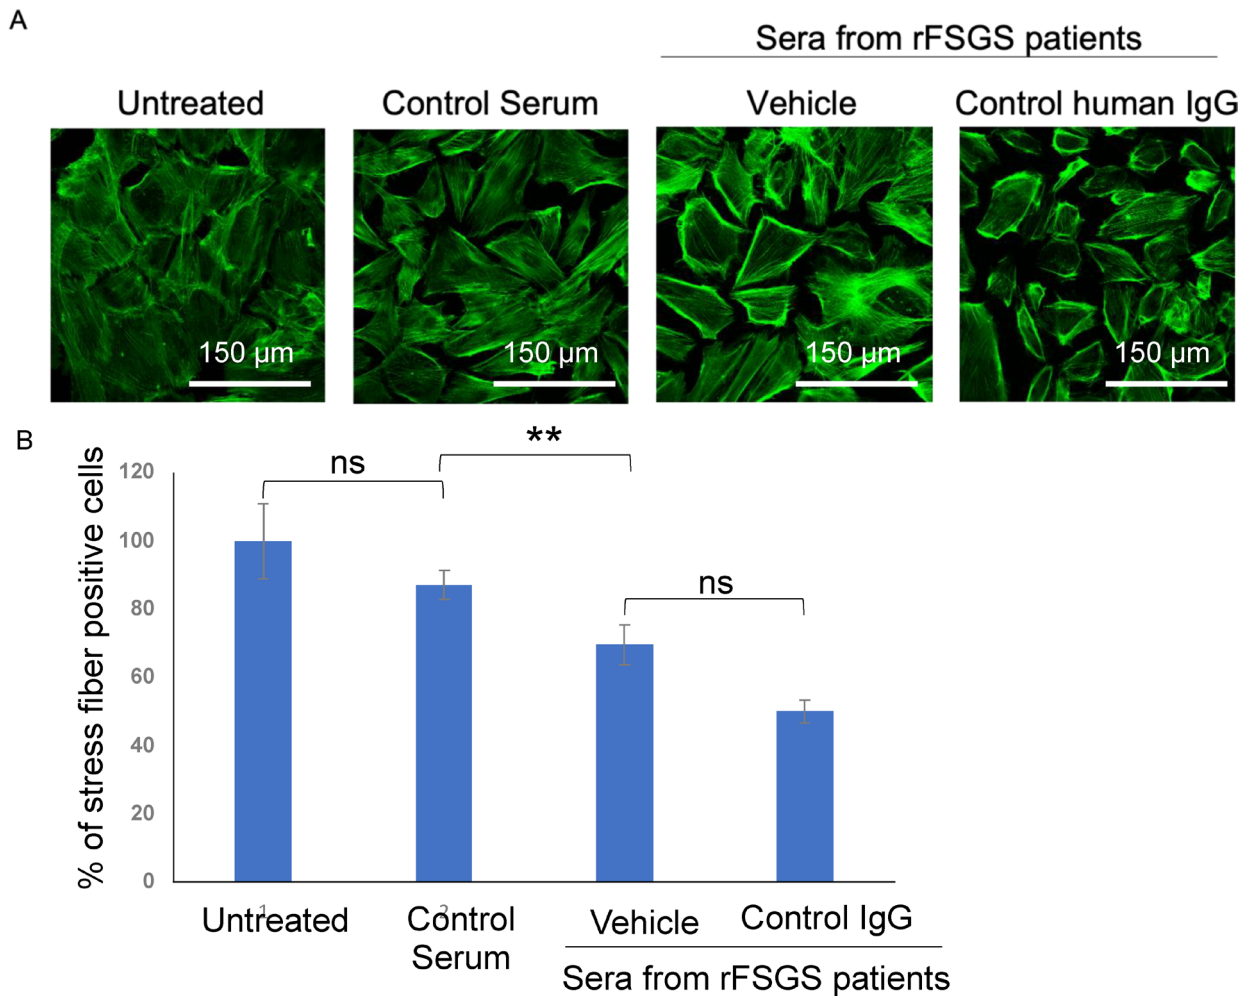

**Figure S1** Treatment with sera from different patients with recurrence of focal segmental glomerulosclerosis (rFSGS) causes injury in podocytes which is not affected by treatment with a control human IgG. (A) A representative image showing intact stress fibers in podocytes after treatment with sera from control patients (end-stage renal disease due to non-FSGS causes). However, sera from rFSGS patients lead to stress fiber loss which cannot be rescued by a control human IgG. (B) Quantification of stress fibers positive cells shows a significant reduction in the number of stress fiber positive podocytes after treatment with sera from rFSGS patients compared to that in control sera-treated podocytes and remains unchanged after pretreatment with control IgG. ns, not significant. \*\* $P < 0.05$ .

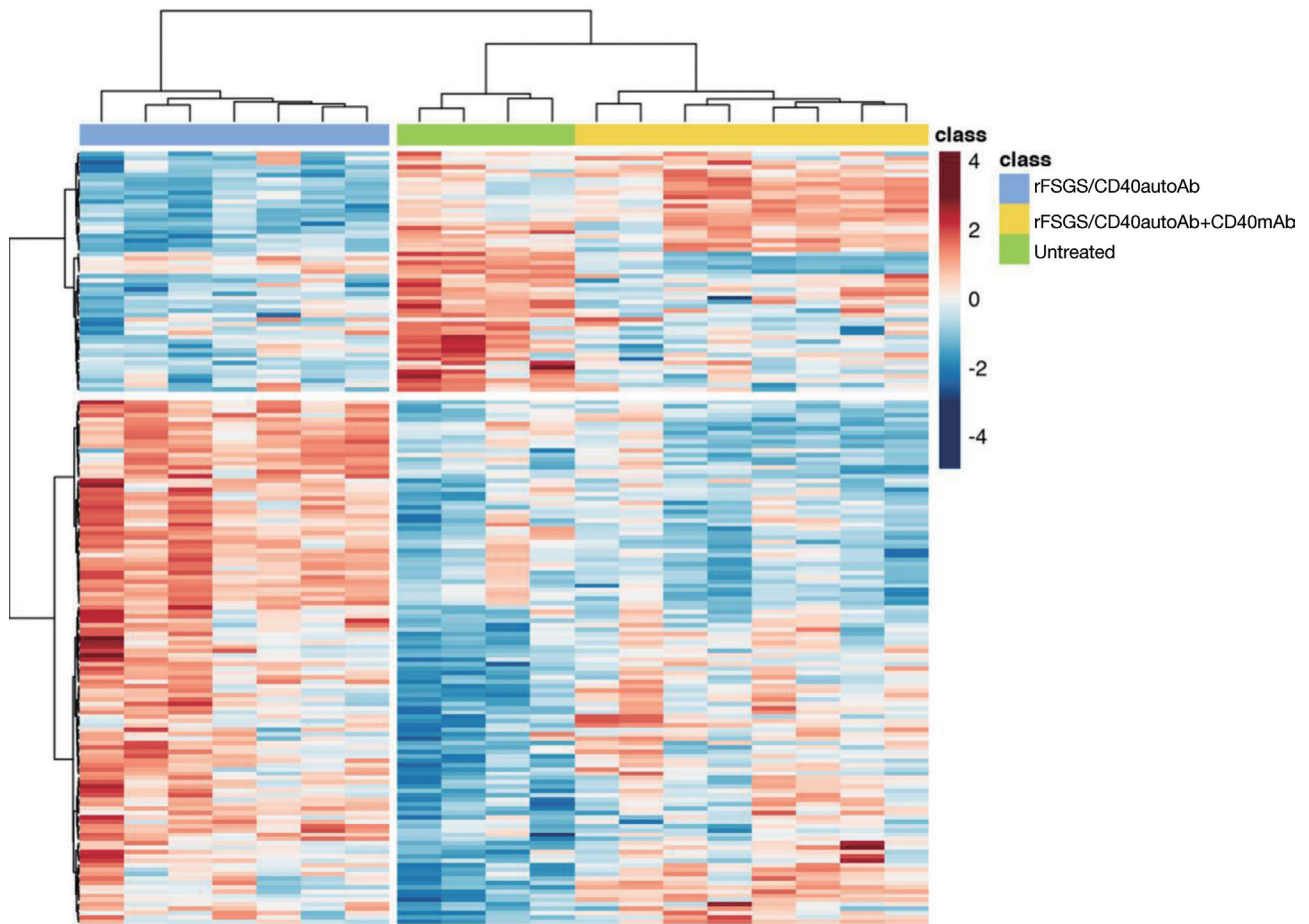

**Figure S2** Anti-CD40 antibody derived from focal segmental glomerulosclerosis (FSGS) patients with recurrence of FSGS after renal transplantation (rFSGS/CD40autoAb) causes injury to podocytes via a CD40-mediated pathway as it can be blocked by a commercial monoclonal anti-CD40 antibody (CD40mAb).
